# Supplementary material for: The Trèmols Herbarium: A European Herbarium from the End of the 19th Century
Source: MDPI journal article supplement (doi:10.3390/d16020105), 2024-02-06
Supplement: s1 [file s1]

**The Trèmols herbarium (BC): an European herbarium of the end of the 19th century**

Laura Gavioli, Neus Nualart, Jordi López-Pujol, Neus Ibáñez

**Supplementary figures and tables**

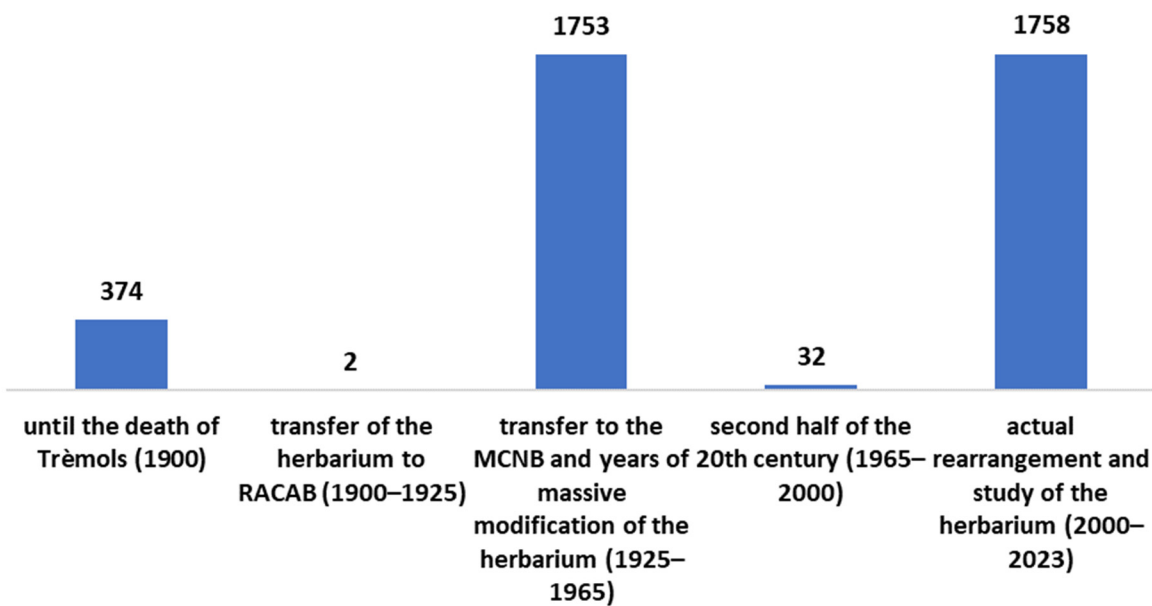

**Figure S1.** Distribution of the identifications of the Trèmols herbarium over the years.

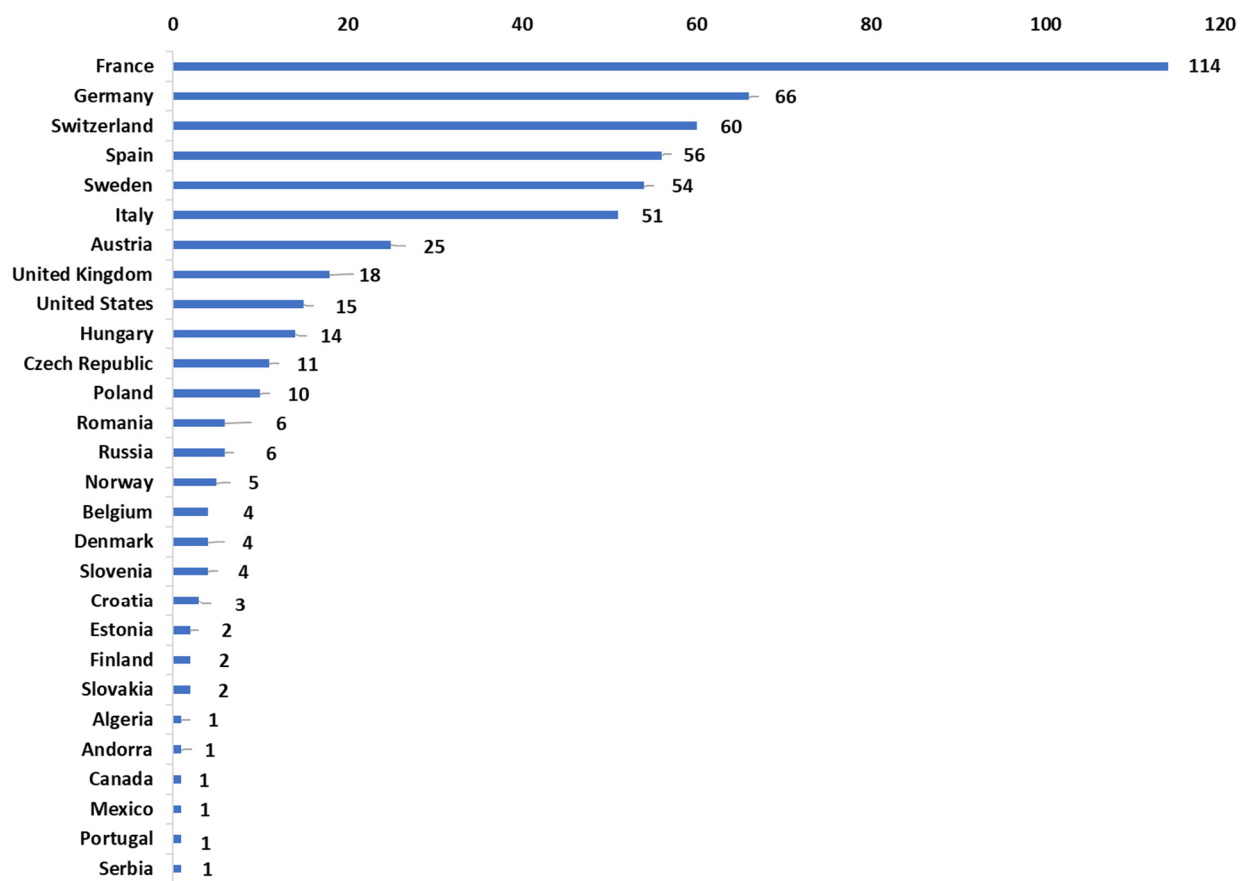

**Figure S2.** The collectors of the Trèmolis herbarium represented according to their nationality.

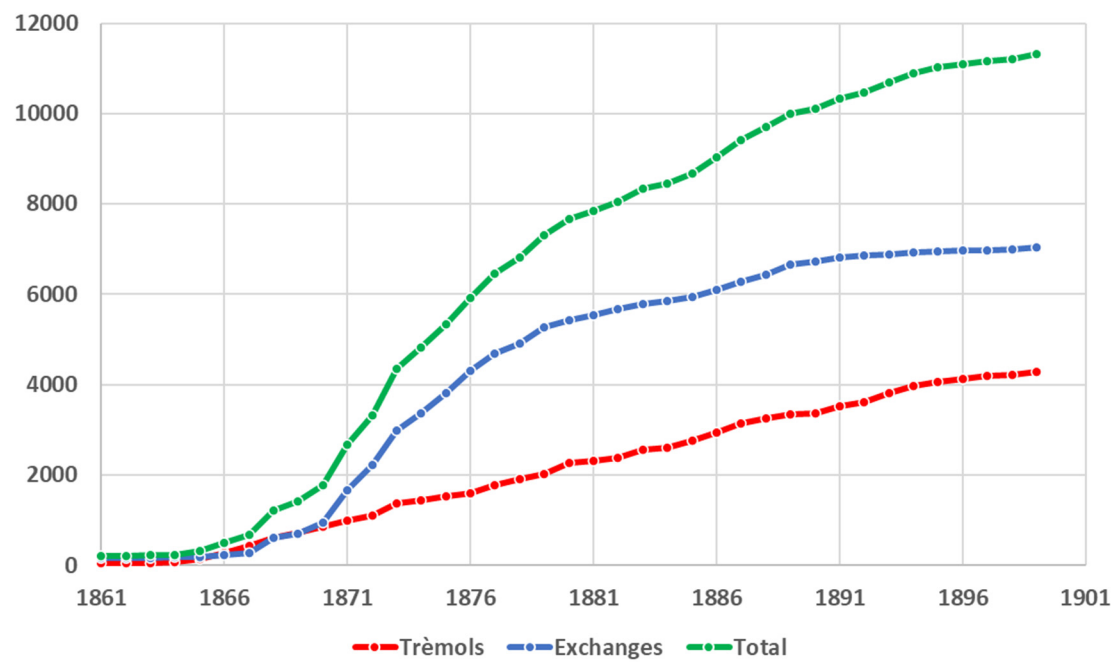

**Figure S3.** Growth curves of the Trèmols herbarium for the period 1861–1899 period. Specimens collected by Trèmols are shown in red and specimens from exchange activities are shown in blue.

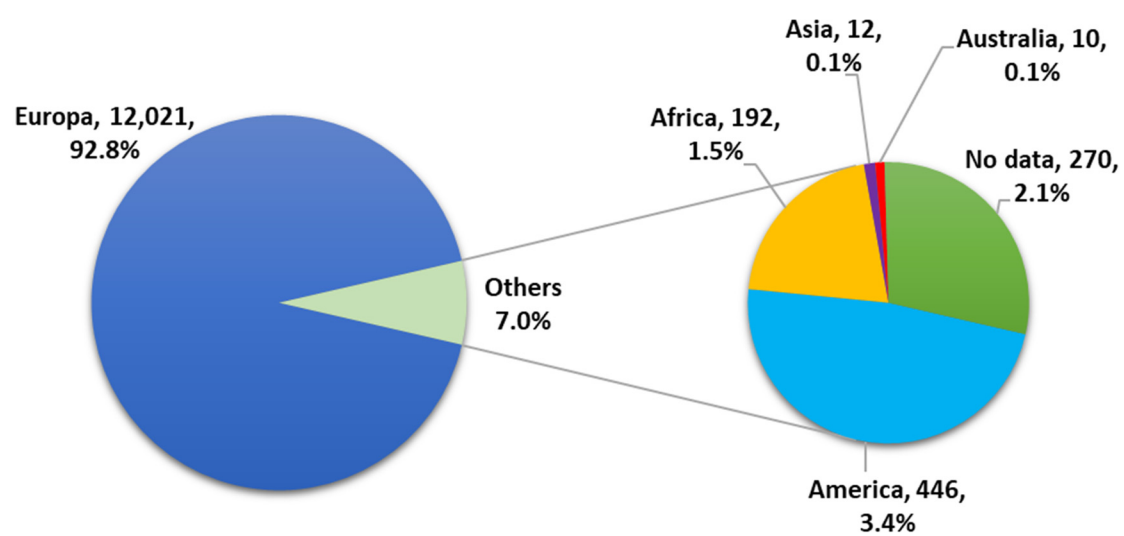

**Figure S4.** Continents of origin of the Trèmol herbarium specimens.

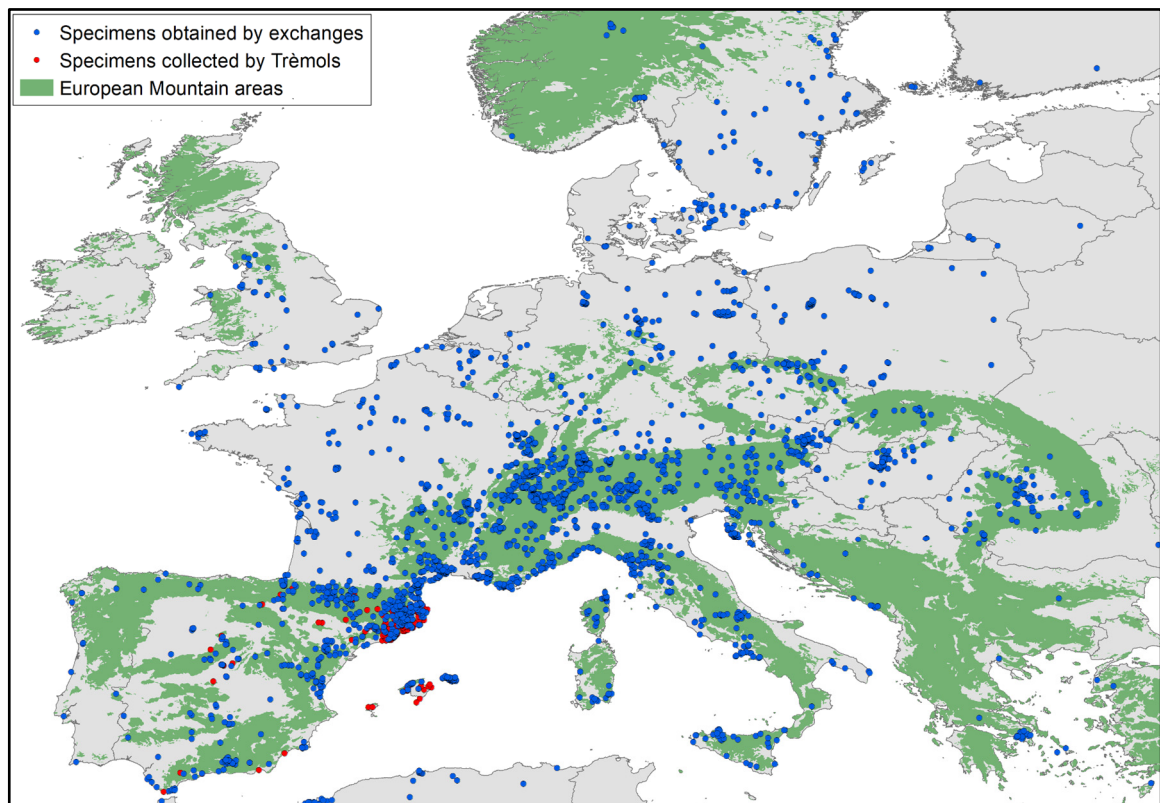

**Figure S5.** Localities of the specimens from the Trèmols herbarium from Europe. Specimens collected by Trèmols are shown by red dots and those obtained through exchanges are shown by blue dots. Green polygons indicate European mountain areas from <https://www.eea.europa.eu/en/datahub/datahubitem-view/48b6f8a7-9e5a-4865-bd05-59c29348b5fb> (accessed 25 October 2023).

**Table S1.** Botanists of the Trèmols herbarium with 10 or more identifications.

| <b>Reviewers</b>         | <b>No. of identifications</b> | <b>Years of identifications</b> | <b>Original vols.</b> | <b>Cryptograms</b> | <b>56 vols.</b> | <b><i>Hieracium</i></b> | <b>Extra boxes</b> |
|--------------------------|-------------------------------|---------------------------------|-----------------------|--------------------|-----------------|-------------------------|--------------------|
| Laura Gavioli            | 1567                          | 2011–2022                       | 23                    | 1                  | 407             | 24                      | 1112               |
| Antoni Marcos            | 1500                          | 1931–1962                       |                       |                    | 1483            |                         | 17                 |
| Frederic Trèmols         | 356                           | 1872                            | 13                    | 3                  | 223             | 31                      | 86                 |
| Oriol de Bolòs           | 123                           | 1947–1969                       |                       |                    | 21              | 102                     |                    |
| Pere Montserrat          | 74                            | 1948–1989                       |                       |                    | 73              |                         | 1                  |
| Ángel María Romo         | 72                            | 1987–2020                       |                       |                    | 4               |                         | 68                 |
| Pius Font Quer           | 64                            | 1945–1961                       |                       |                    | 26              |                         | 38                 |
| Pablo González           | 29                            | 2019                            |                       |                    |                 |                         | 29                 |
| Juan José Aldasoro & al. | 24                            | 1999                            |                       |                    | 24              |                         |                    |
| Antoni de Bolòs          | 11                            | 1961–1962                       |                       |                    | 10              |                         | 1                  |
| James Dele Olowokudejo   | 10                            | 1979                            |                       |                    | 10              |                         |                    |

**Table S2.** Collectors who gathered plants over a period of more than 20 years, indicating their nationality, interval of gathering, number of specimens and ratio of specimens per year.

| Collectors                                        | Collector nationality | Interval of gathering | No. of years | No. of specimens | Ratio specimens/year |
|---------------------------------------------------|-----------------------|-----------------------|--------------|------------------|----------------------|
| Frederic Trèmols Borrell (1831–1900)              | Spanish               | 1848–1899             | 52           | 4849             | 92.3                 |
| Charles Auguste Edouard Cornaz (1825–1911)        | French                | 1844–1892             | 49           | 103              | 2.1                  |
| Jean Odon Debeaux (1826–1910)                     | French                | 1854–1898             | 45           | 123              | 2.7                  |
| Alexander Carl Heinrich Braun (1805–1877)         | German                | 1827–1870             | 44           | 10               | 0.2                  |
| Ferdinand Othon Wolf (1838–1906)                  | German                | 1851–1885             | 35           | 13               | 0.4                  |
| Henri Ferdinand van Heurck (1838–1909)            | Belgian               | 1867–1899             | 33           | 323              | 9.8                  |
| Joseph Whipple Congdon (1834–1910)                | American              | 1855–1887             | 33           | 292              | 8.8                  |
| Estanislao Vayreda Vila (1848–1901)               | Spanish               | 1869–1899             | 31           | 208              | 6.7                  |
| Eugène Juglar (ca. 1840–?)                        | French                | 1868–1898             | 31           | 27               | 0.9                  |
| Manuel Mercader Luis (?–?)                        | Spanish               | 1866–1895             | 30           | 8                | 0.3                  |
| Jean Michel Gandoger (1850–1926)                  | French                | 1867–1895             | 29           | 157              | 5.4                  |
| Josep Cuffí Pujol (1843–?)                        | Spanish               | 1870–1898             | 29           | 12               | 0.4                  |
| Eugène-Laurent Berher (1822–1900)                 | French                | 1870–1896             | 27           | 53               | 2.0                  |
| Francisco Loscos Bernal (1823–1886)               | Spanish               | 1861–1886             | 26           | 129              | 5.0                  |
| Juan Ignacio Puiggarí (1823–1900)                 | Spanish               | 1857–1882             | 26           | 105              | 4.0                  |
| Jaume Pujol Mercè (1852–1895)                     | Spanish               | 1872–1897             | 26           | 18               | 0.7                  |
| Baptiste Jacob (1830–1918)                        | Swiss                 | 1871–1895             | 25           | 218              | 8.7                  |
| Josef Franz Freyn (1845–1903)                     | Czech                 | 1870–1894             | 25           | 172              | 6.9                  |
| Hans Siegfried (1837–1903)                        | Swiss                 | 1867–1891             | 25           | 111              | 4.4                  |
| Richter Ludwig (1844–1917)                        | Hungarian             | 1870–1893             | 24           | 171              | 7.1                  |
| Carlo Pietro Stefano Sommier (1848–1922)          | Italian               | 1870–1893             | 24           | 128              | 5.3                  |
| Juan Texidor Cos (1836–1885)                      | Spanish               | 1865–1888             | 24           | 26               | 1.1                  |
| Louis Charles Edmond Mandon (1856–1910)           | French                | 1877–1899             | 23           | 110              | 4.8                  |
| Marie Clément Gaston Gautier (1841–1911)          | French                | 1865–1887             | 23           | 109              | 4.7                  |
| Fritz Tripet (1843–1907)                          | Swiss                 | 1869–1891             | 23           | 63               | 2.7                  |
| Anatole Guillon (1819–1908)                       | French                | 1864–1886             | 23           | 32               | 1.4                  |
| Joseph Gabriel Marie Hervier-Basson (1846–1922)   | French                | 1871–1893             | 23           | 17               | 0.7                  |
| Theodor Heinrich Hermann de Heldreich (1822–1902) | German                | 1877–1899             | 23           | 6                | 0.3                  |
| George Mathias von Martens (1788–1872)            | German                | 1813–1835             | 23           | 6                | 0.3                  |
| Jules Ami Sandoz (1857–1928)                      | American              | 1875–1896             | 22           | 114              | 5.2                  |
| Alphonse Autheman (1832–1913)                     | French                | 1871–1892             | 22           | 32               | 1.5                  |

|                                              |          |           |    |     |      |
|----------------------------------------------|----------|-----------|----|-----|------|
| Henri Bordère (1825–1889)                    | French   | 1869–1889 | 21 | 217 | 10.3 |
| Rudolf Hülsen (1837–1912)                    | German   | 1866–1886 | 21 | 141 | 6.7  |
| Jozsef Barth (1833–1915)                     | Romanian | 1870–1890 | 21 | 122 | 5.8  |
| Louis Favrat (1827–1893)                     | Swiss    | 1870–1890 | 21 | 38  | 1.8  |
| Claude-Albert Gérard (1837–1905)             | French   | 1873–1893 | 21 | 35  | 1.7  |
| Rosine Masson (1808–1891)                    | Swiss    | 1869–1889 | 21 | 33  | 1.6  |
| A. Godet (?–?)                               | French   | 1872–1892 | 21 | 9   | 0.4  |
| Ferdinand Wilhelm Werner Bertram (1835–1899) | German   | 1867–1887 | 21 | 6   | 0.3  |
| Karl Gustav Adolf Winkler (1810–1893)        | German   | 1842–1862 | 21 | 2   | 0.1  |
| Henry (Enrico) Groves (1835–1891)            | English  | 1869–1875 | 20 | 107 | 4.0  |
| Ferdinand Albert Heidenreich (1819–1901)     | Russian  | 1865–1884 | 20 | 40  | 2.0  |
| Jakob Jäggi (1829–1894)                      | Swiss    | 1870–1889 | 20 | 30  | 1.5  |
| Olof Theodor Brown (1845–1893)               | Swedish  | 1871–1890 | 20 | 7   | 0.4  |



**Table S3.** Collection countries with more than 25 specimens in the Trèmols herbarium; the number of specimens and their percentage is indicated.

| Country                  | No. of specimens | Percentage of specimens (%) |
|--------------------------|------------------|-----------------------------|
| Spain                    | 6013             | 46.4%                       |
| France                   | 1919             | 14.8%                       |
| Italy                    | 1088             | 8.4%                        |
| Switzerland              | 875              | 6.8%                        |
| United States of America | 398              | 3.1%                        |
| Hungary                  | 350              | 2.7%                        |
| Austria                  | 321              | 2.5%                        |
| Germany                  | 239              | 1.8%                        |
| Poland                   | 234              | 1.8%                        |
| Romania                  | 187              | 1.4%                        |
| Sweden                   | 180              | 1.4%                        |
| Algeria                  | 162              | 1.2%                        |
| Croatia                  | 137              | 1.1%                        |
| Czechia                  | 92               | 0.7%                        |
| Bolivia                  | 57               | 0.4%                        |
| Russia                   | 52               | 0.4%                        |
| United Kingdom           | 49               | 0.4%                        |
| Norway                   | 44               | 0.3%                        |
| Slovakia                 | 41               | 0.3%                        |
| Belgium                  | 35               | 0.3%                        |
| Cuba                     | 30               | 0.2%                        |
| Slovenia                 | 30               | 0.2%                        |
| Greece                   | 25               | 0.2%                        |

**Table S4.** Vascular plant families of the Trèmols herbarium with more than 100 specimens.  
Number of taxa (including genus, hybrids, species and infraspecies levels) and number of species are indicated.

| <b>Families</b> | <b>No. of specimens</b> | <b>Percentage of specimens (%)</b> | <b>No. of taxa</b> | <b>Percentage of taxa (%)</b> | <b>No. of species</b> | <b>Percentage of species (%)</b> |
|-----------------|-------------------------|------------------------------------|--------------------|-------------------------------|-----------------------|----------------------------------|
| Fabaceae        | 2457                    | 19.0%                              | 538                | 12.2%                         | 471                   | 12.4%                            |
| Asteraceae      | 1026                    | 7.9%                               | 472                | 10.7%                         | 3394                  | 10.3%                            |
| Rosaceae        | 1023                    | 7.9%                               | 319                | 7.3%                          | 284                   | 7.4%                             |
| Caryophyllaceae | 1003                    | 7.7%                               | 310                | 7.1%                          | 268                   | 7.0%                             |
| Brassicaceae    | 912                     | 7.0%                               | 326                | 7.4%                          | 294                   | 7.7%                             |
| Poaceae         | 836                     | 6.5%                               | 312                | 7.1%                          | 277                   | 7.3%                             |
| Cyperaceae      | 567                     | 4.4%                               | 265                | 6.0%                          | 248                   | 6.5%                             |
| Ranunculaceae   | 556                     | 4.3%                               | 203                | 4.6%                          | 181                   | 4.7%                             |
| Lamiaceae       | 319                     | 2.5%                               | 73                 | 1.7%                          | 62                    | 1.6%                             |
| Caprifoliaceae  | 277                     | 2.1%                               | 86                 | 2.0%                          | 79                    | 2.1%                             |
| Plantaginaceae  | 267                     | 2.1%                               | 82                 | 1.9%                          | 65                    | 1.7%                             |
| Cistaceae       | 199                     | 1.5%                               | 64                 | 1.5%                          | 50                    | 1.3%                             |
| Geraniaceae     | 196                     | 1.5%                               | 54                 | 1.2%                          | 52                    | 1.4%                             |
| Orchidaceae     | 195                     | 1.5%                               | 69                 | 1.6%                          | 59                    | 1.5%                             |
| Violaceae       | 193                     | 1.5%                               | 62                 | 1.4%                          | 51                    | 1.3%                             |
| Papaveraceae    | 189                     | 1.5%                               | 50                 | 1.1%                          | 46                    | 1.2%                             |
| Malvaceae       | 164                     | 1.3%                               | 53                 | 1.2%                          | 44                    | 1.2%                             |
| Onagraceae      | 139                     | 1.1%                               | 28                 | 0.6%                          | 24                    | 0.6%                             |
| Linaceae        | 131                     | 1.0%                               | 35                 | 0.8%                          | 31                    | 0.8%                             |
| Juncaceae       | 127                     | 1.0%                               | 45                 | 1.0%                          | 43                    | 1.1%                             |
| Hypericaceae    | 123                     | 1.0%                               | 45                 | 1.0%                          | 40                    | 1.0%                             |
| Boraginaceae    | 117                     | 0.9%                               | 28                 | 0.6%                          | 21                    | 0.6%                             |

**Table S5.** The 28 taxa from the Trèmols herbarium that are cited in the Catalan Red Book [55] according to the IUCN threat categories, their endemism status and the number of specimens.

The accepted name according to POWO [37] is also indicated when it is different.

| <b>Taxon according the Catalan Red Book</b>                                             | <b>IUCN category</b> | <b>Endemic status</b> | <b>No. of specimens</b> |
|-----------------------------------------------------------------------------------------|----------------------|-----------------------|-------------------------|
| <i>Armeria ruscinonensis</i>                                                            | LC                   | YES                   | 1                       |
| <i>Astragalus austriacus</i>                                                            | VU                   | NO                    | 1                       |
| <i>Cardamine amara</i> subsp. <i>pyrenaea</i>                                           | LC                   | YES                   | 1                       |
| <i>Cardamine crassifolia</i>                                                            | LC                   | YES                   | 1                       |
| <i>Cerastium pyrenaicum</i> (≡ <i>Cerastium latifolium</i> subsp. <i>pyrenaicum</i> )   | LC                   | YES                   | 1                       |
| <i>Delphinium montanum</i>                                                              | VU                   | YES                   | 1                       |
| <i>Dianthus multiceps</i>                                                               | LC                   | YES                   | 2                       |
| <i>Dianthus pyrenaicus</i> subsp. <i>attenuatus</i>                                     | LC                   | YES                   | 9                       |
| <i>Dianthus seguieri</i> subsp. <i>requienii</i>                                        | LC                   | YES                   | 15                      |
| <i>Dianthus vigoii</i>                                                                  | LC                   | YES                   | 1                       |
| <i>Erodium rupestre</i>                                                                 | LC                   | YES                   | 5                       |
| <i>Erysimum ruscinonense</i> (= <i>Erysimum collisparsum</i> )                          | LC                   | YES                   | 10                      |
| <i>Halimium halimifolium</i> subsp. <i>halimifolium</i> (= <i>Cistus halimifolius</i> ) | VU                   | NO                    | 2                       |
| <i>Hieracium cordifolium</i> (= <i>Hieracium umbellatum</i> subsp. <i>umbellatum</i> )  | LC                   | YES                   | 3                       |
| <i>Hieracium cordatum</i>                                                               | LC                   | YES                   | 5                       |
| <i>Hieracium gouanii</i>                                                                | LC                   | YES                   | 1                       |
| <i>Hieracium sonchoides</i>                                                             | LC                   | YES                   | 1                       |
| <i>Hippuris vulgaris</i>                                                                | CR                   | NO                    | 1                       |
| <i>Lomelosia pulsatilloides</i> subsp. <i>macropoda</i>                                 | LC                   | YES                   | 1                       |
| <i>Maresia nana</i>                                                                     | VU                   | NO                    | 3                       |
| <i>Nymphaea alba</i>                                                                    | EN                   | NO                    | 1                       |
| <i>Oplismenus undulatifolius</i>                                                        | CR                   | NO                    | 2                       |
| <i>Polygala vayredae</i>                                                                | VU                   | YES                   | 1                       |
| <i>Prunus lusitanica</i> subsp. <i>lusitanica</i>                                       | VU                   | NO                    | 1                       |
| <i>Ranunculus ruscinonensis</i>                                                         | LC                   | YES                   | 2                       |
| <i>Rumex hydrolapathum</i>                                                              | CR                   | NO                    | 1                       |
| <i>Silene sennenii</i>                                                                  | EN                   | YES                   | 1                       |
| <i>Xatardia scabra</i>                                                                  | LC                   | YES                   | 1                       |
| <b>Total general</b>                                                                    |                      |                       | <b>75</b>               |
